# Supplementary material
Source: PubMed Central journal article supplement (PMC3266536)
Supplement: NIHMS341494-supplement-02.pdf [file NIHMS341494-supplement-02.pdf]

| ChIP-Seq              | Total Tags | Binding Sites | Target Genes | 3'UTR (%) | TSS (%) | Exon (%) | Intron (%) | Intergenic (%) | Promoter (%) | 5'UTR (%) |
|-----------------------|------------|---------------|--------------|-----------|---------|----------|------------|----------------|--------------|-----------|
| Foxa1 in ♀control     | 26,733,886 | 9,337         | 5,598        | 0.58      | 1.32    | 2.43     | 44.91      | 42.18          | 8.43         | 0.16      |
| Foxa2 in ♀control     | 26,932,294 | 17,531        | 8,253        | 0.68      | 1.82    | 2.06     | 53.25      | 37.03          | 5.01         | 0.14      |
| Foxa1 in ♀control+DEN | 26,395,516 | 14,939        | 7,185        | 0.61      | 1.45    | 1.93     | 49.12      | 39.69          | 6.65         | 0.17      |
| Foxa2 in ♀control+DEN | 28,225,206 | 38,309        | 11,657       | 0.63      | 1.56    | 1.92     | 50.06      | 39.98          | 5.70         | 0.13      |
| Foxa1 in ♂control     | 29,685,552 | 17,796        | 7,960        | 0.60      | 1.35    | 1.74     | 46.76      | 43.64          | 5.78         | 0.12      |
| Foxa2 in ♂control     | 30,325,531 | 11,613        | 6,170        | 0.74      | 1.73    | 2.31     | 51.27      | 38.95          | 4.89         | 0.11      |
| Foxa1 in ♂control+DEN | 26,465,443 | 28,449        | 10,225       | 0.66      | 1.49    | 1.87     | 49.49      | 40.66          | 5.68         | 0.13      |
| Foxa2 in ♂control+DEN | 30,923,817 | 18,835        | 8,524        | 0.56      | 1.31    | 1.88     | 47.42      | 42.13          | 6.54         | 0.14      |
| ERα in ♀control       | 29,374,596 | 11,225        | 7,132        | 0.62      | 2.05    | 5.71     | 36.78      | 35.86          | 18.11        | 0.83      |
| ERα in ♀control+DEN   | 25,931,991 | 13,033        | 6,010        | 0.68      | 1.71    | 3.06     | 45.62      | 38.59          | 10.02        | 0.31      |
| ERα in ♀mutant+DEN    | 29,903,431 | 2,777         | 2,391        | 0.43      | 1.40    | 14.40    | 42.38      | 38.10          | 3.02         | 0.25      |
| AR in ♂control        | 33,437,805 | 5,807         | 4,154        | 0.64      | 1.77    | 3.70     | 38.87      | 42.72          | 12.02        | 0.22      |
| AR in ♂control+DEN    | 29,890,415 | 15,998        | 7,648        | 0.63      | 1.80    | 1.89     | 49.58      | 39.73          | 6.29         | 0.08      |
| AR in ♂mutant+DEN     | 26,931,940 | 1,915         | 1,588        | 0.42      | 0.84    | 5.54     | 36.14      | 55.98          | 0.99         | 0.10      |

**Table S1. Related to Figure 2**

Genomic analysis from all ChIP-Seq datasets. ChIP was performed on liver chromatin of gender, genotype, and treatment as indicated in the first column. Binding sites and their nearest targeted genes were determined using the HOMER algorithm with motif filtering (Heinz et al., 2011). TSS, 100 bp surrounding transcription start sites; promoter, 1 kb surrounding transcription start sites.

| Dual Binding Sites                | 3'UTR<br>(%) | TSS<br>(%) | Exon<br>(%) | Intron<br>(%) | Intergenic<br>(%) | Promoter<br>(%) | 5'UTR<br>(%) |
|-----------------------------------|--------------|------------|-------------|---------------|-------------------|-----------------|--------------|
| Foxa1/ER $\alpha$ in ♀control     | 0.944811     | 1.619676   | 2.684463    | 39.75705      | 41.82663          | 11.71266        | 1.544691     |
| Foxa2/ER $\alpha$ in ♀control     | 0.955171     | 1.6811     | 3.222109    | 39.7351       | 39.63321          | 13.20683        | 1.642894     |
| Foxa1/ER $\alpha$ in ♀control+DEN | 1.091582     | 1.415356   | 1.72988     | 47.05828      | 40.47179          | 7.779833        | 0.508788     |
| Foxa2/ER $\alpha$ in ♀control+DEN | 1.16327      | 1.534527   | 1.938784    | 46.34106      | 39.57594          | 8.844155        | 0.651761     |
| Foxa1/AR in ♂control              | 0.97629      | 1.67364    | 2.161785    | 40.07438      | 45.74616          | 8.879591        | 0.627615     |
| Foxa2/AR in ♂control              | 1.142573     | 1.564829   | 2.334824    | 42.5236       | 42.67263          | 9.289617        | 0.620964     |
| Foxa1/AR in ♂control+DEN          | 1.163115     | 1.622789   | 0.968101    | 50.73826      | 40.41649          | 4.847472        | 0.285555     |
| Foxa2/AR in ♂control+DEN          | 1.014607     | 1.434444   | 0.839675    | 50.75658      | 41.80005          | 3.988454        | 0.218665     |

**Table S2. Related to Figure 2**

Genomic distribution of Foxa/ER $\alpha$  or Foxa/AR dual binding sites. Dual binding sites were defined by close consensus binding elements within 250 bp.

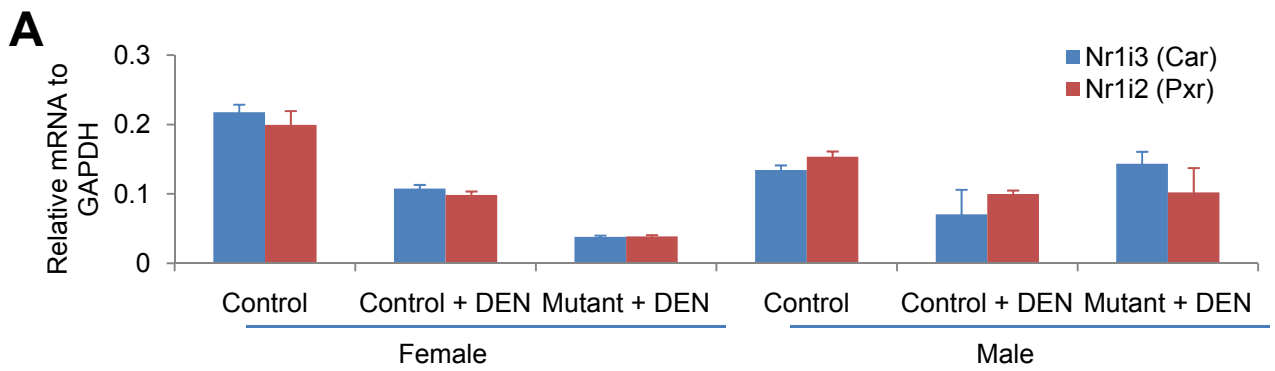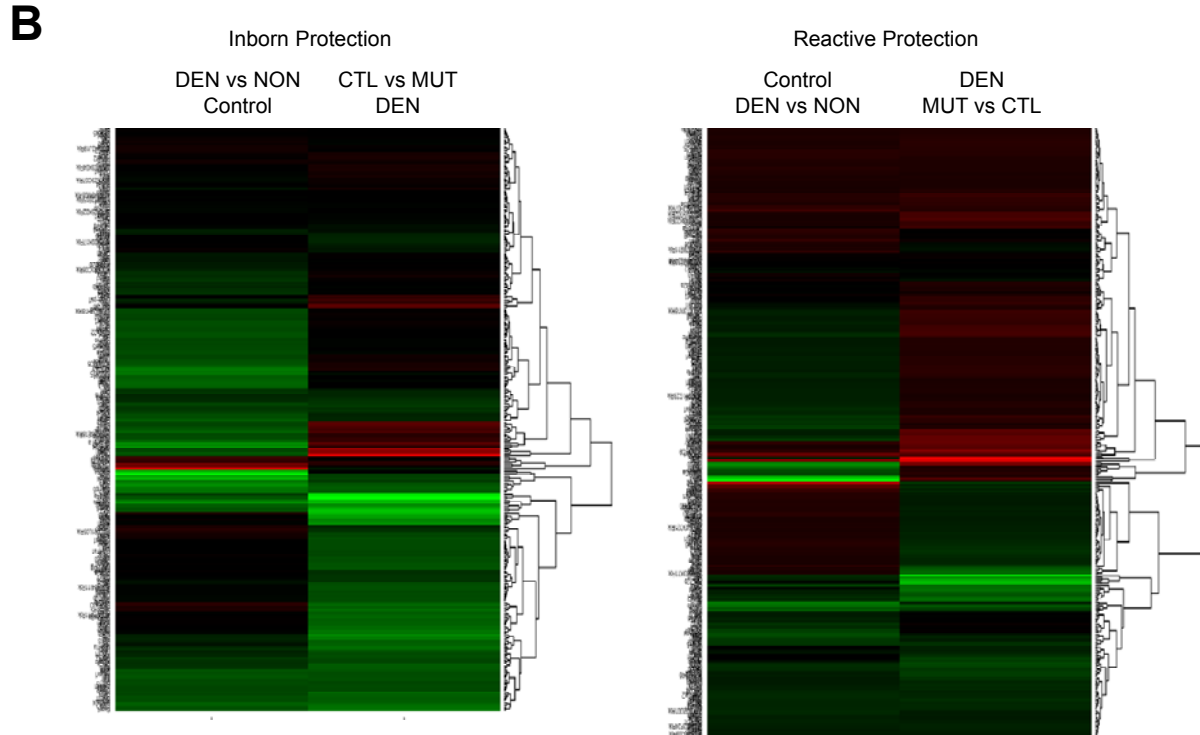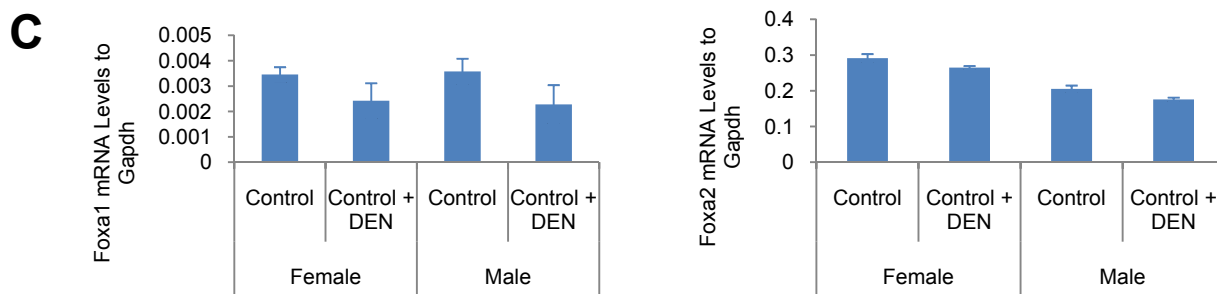

**Figure S1. Related to Figure 1**

(A) Gene expression levels of constitutive androstane receptor (Car, or Nr1i3) and pregnane X receptor (Pxr, or Nr1i2) in liver of female and male control and Foxa1/2 mutant mice treated or not treated with DEN.

(B) The change of gene expression of Foxa/ER $\alpha$  dual targets in female control mice was mostly reversed in mutant mice during hepatocarcinogenesis in both groups of inborn and reactive protection. DEN, mice with carcinogen; NON, mice without carcinogen. MUT, mutant mice; CTL, control mice.

(C) Hepatic Foxa1 and Foxa2 expression in female and male control mice with or without carcinogen (DEN) treatment.

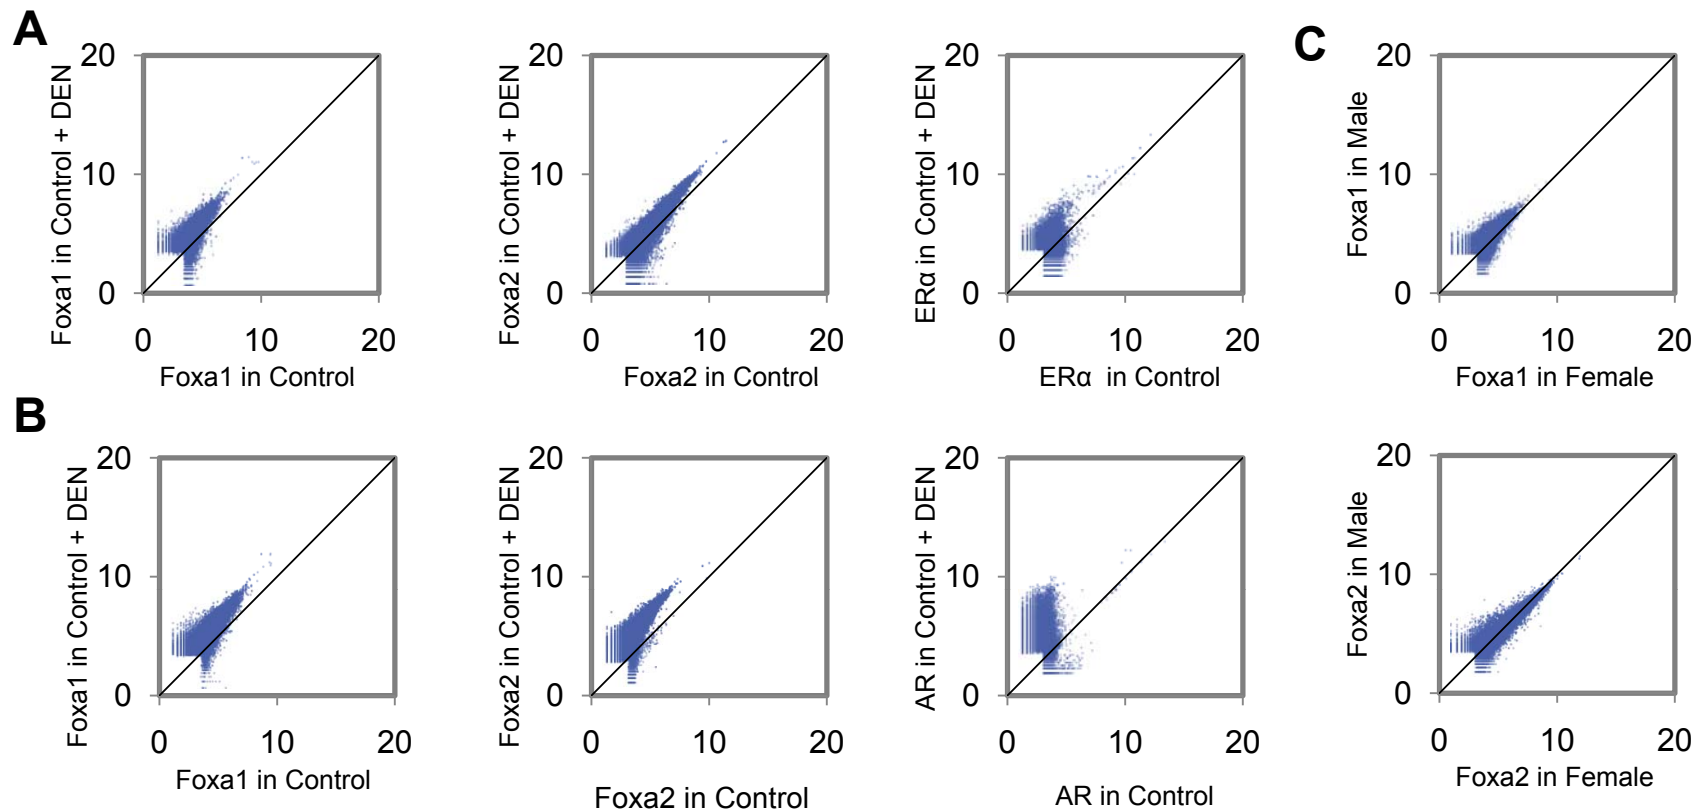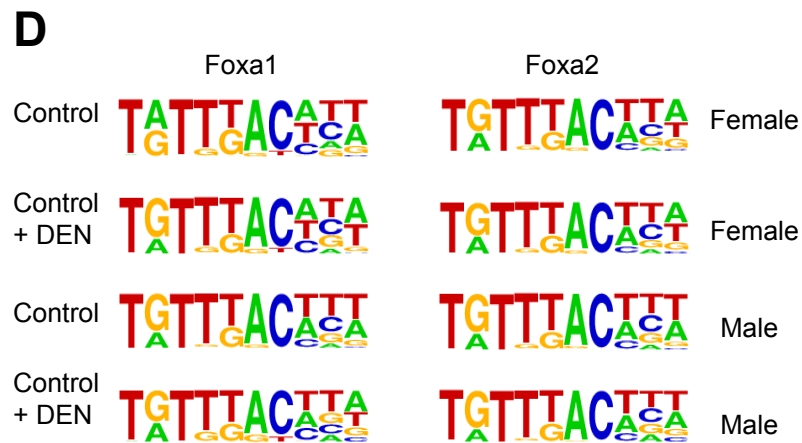

**Figure S2. Related to Figure 2**  
**Genomewide Occupancy of Foxa1, Foxa2, and ER $\alpha$ /AR in control and carcinogen-treated liver**

(A, B) Genomewide occupancy of Foxa1, Foxa2, and ER $\alpha$ /AR in female (A) and male (B) control livers with and without carcinogen (DEN) administration. Values are log<sub>2</sub> of total tag number at each peak region from pooled peaks of two comparisons after normalization to 10 million ChIP-Seq tags each.

(C) Genomewide occupancy of Foxa1 and Foxa2 between female and male control livers without carcinogen (DEN) administration. Values are from log<sub>2</sub> of total tags number from pooled peaks after normalization to 10 million ChIP-Seq tags each.

(D) Motif analysis using HOMER for Foxa1 or Foxa2 binding sites in female and male control liver with or without carcinogen treatment.

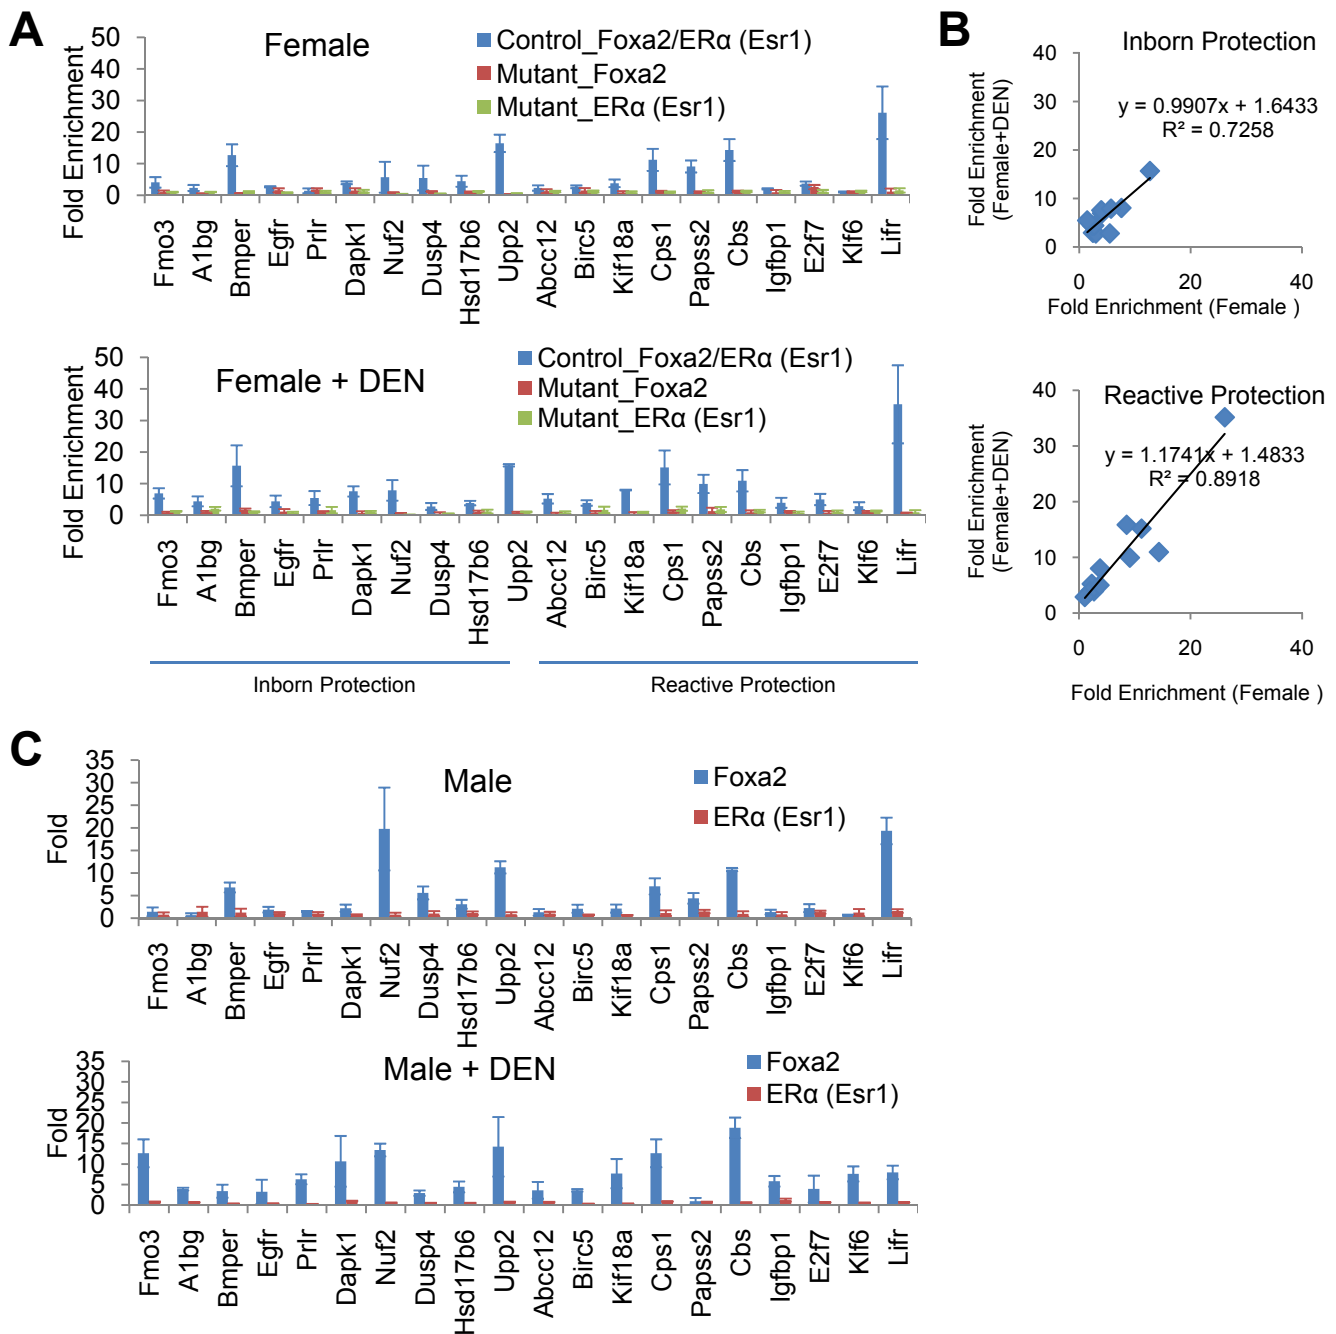

**Figure S3. Related to Figure 3**

**Occupancy of Foxa2 and ER $\alpha$  in control and carcinogen-treated liver**

(A, C) Occupancy of Foxa2 and ER $\alpha$  in female (A) and male (C) control livers with and without carcinogen (DEN) administration by ChIP-qPCR. Ers1, gene name for ER $\alpha$ .

(B) Correlation analysis of ChIP enrichment of Foxa2/ER $\alpha$  dual targets between female mice with and without DEN administration for genes classified to potentially function in inborn or reactive protection.

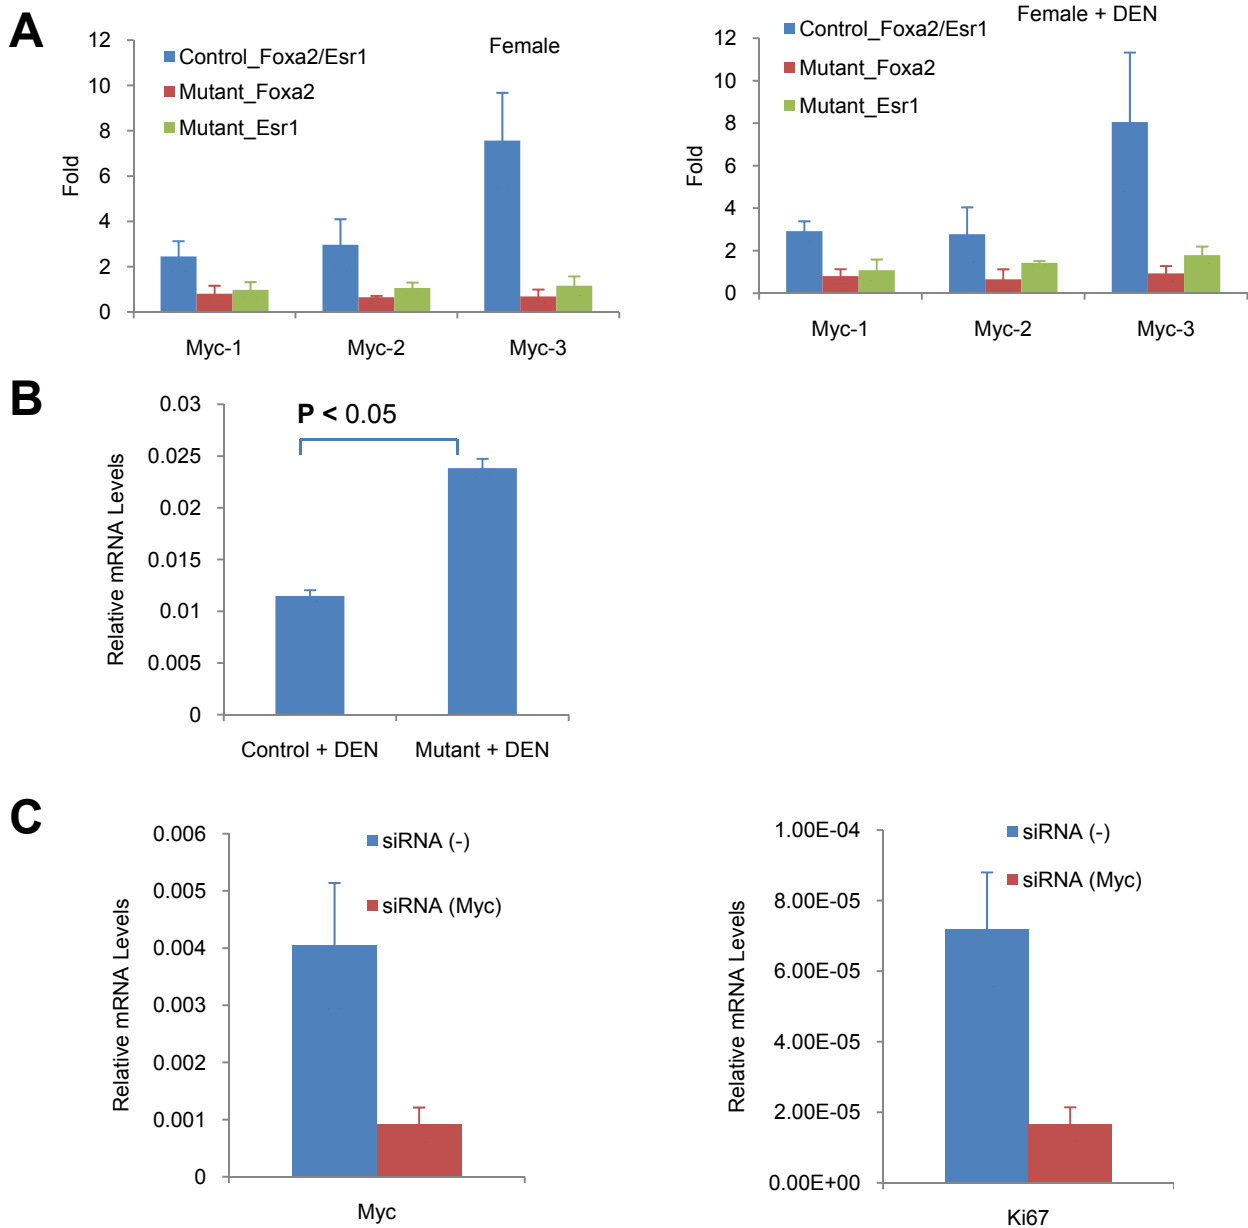

**Figure S4. Related to Figure 4**  
**Comprehensive protection to hepatocarcinogenesis by the co-regulation of Foxa1/2 and ER $\alpha$**

(A) Chromatin immunoprecipitation (ChIP) assays for Foxa2/ER $\alpha$  dual targets in female mice with/without carcinogen (DEN) administration. Ers1, gene name for ER $\alpha$ .

(B) Myc expression in control and Foxa1/2 mutant female liver after DEN treatment. n=4 in each group.

(C) Suppression of cell proliferation, as measured by Ki67 expression, by Myc siRNA in primary hepatocytes isolated from female DEN-treated mutant mice.

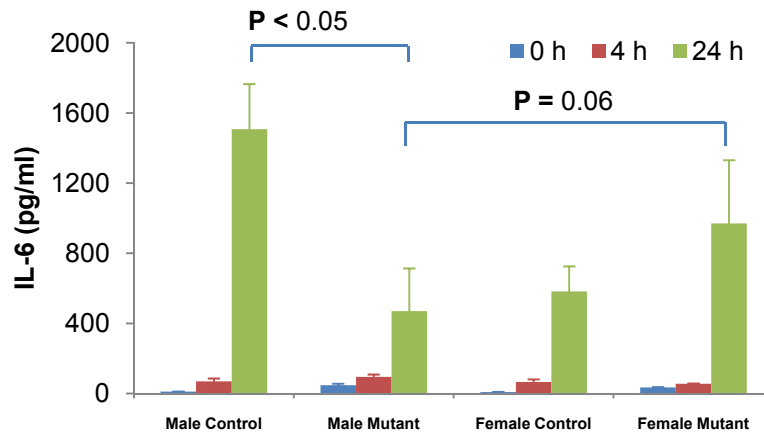

**Figure S5. Related to Figure 5**  
**Serum interleukin-6 (IL-6) levels in mice at 0, 4 and 24 hours after carcinogen administration**

8-week old control and *Foxa1/2* mutant mice of both genders were injected Intraperitoneally with DEN (100  $\mu\text{g/g}$  body weight) before the analysis of serum IL-6 levels.

**A**

| ChIP/SNP | FOXA2  |       |       |       |       | ER $\alpha$ |       |       |       |       | Mutation |        |        |           | SNP Description                                    |
|----------|--------|-------|-------|-------|-------|-------------|-------|-------|-------|-------|----------|--------|--------|-----------|----------------------------------------------------|
|          | Normal | HCC-1 | HCC-2 | HCC-3 | HCC-4 | Normal      | HCC-1 | HCC-2 | HCC-3 | HCC-4 | HCC-1    | HCC-2  | HCC-3  | HCC-4     |                                                    |
| KLF6     | 6.1    | 2.9   | 2.2   | 5.5   | 27.5  | 2.4         | 2.1   | 1.8   | 5.9   | 22.9  | NO       | YES    | NO     | NO        | AAACA > AAAA(14)CA<br>TTTTT > TT(16)TTTT           |
| MYC (1)  | 9.9    | 4.1   | 12.3  | 2.6   | 7     | 4.5         | 2.8   | 1.8   | 6.1   | 3.3   | YES      | NO     | NO     | YES       | AAATA > AAGTA                                      |
| PLXNA2   | 3.9    | 1.9   | 3.7   | 3.2   | 4.5   | 3           | 1.6   | 1.4   | 2.2   | 2.7   | YES      | NO     | NO     | NO        | TGTTT > T--TT                                      |
| ACMSD    | 5      | 2.1   | 18.4  | 3.4   | 16.1  | 3.5         | 1.3   | 4.4   | 3.4   | 6.2   | YES      | NO     | NO     | NO        | TCTTT > TCTTC                                      |
| PTP1B    | 17.5   | 0.6   | 8.6   | 2.1   | 24.1  | 4.3         | 0.6   | 1.6   | 2.2   | 6.5   | NO       | NO     | NO     | NO        | AAACA > AAAGT*<br>AAACA > AAACG*<br>AAACA > AAACC* |
| NIPAL1   | 13.9   | 2.6   | 4.1   | 3.6   | 13.5  | 4.2         | 2.8   | 1.3   | 7.6   | 5.4   | NO       | AAAGT* | AAACG* | NO        | AAACA > AAACCA                                     |
| ANKRD50  | 3.6    | 3.3   | 4.8   | 4     | 2.6   | 3.7         | 1.8   | 0.8   | 2.8   | 0.9   | NO       | AAAGT* | AAACC* | NO        | AAACA > AAAGA                                      |
| GCLC     | 5.1    | 1.9   | 6.5   | 4.5   | 6.2   | 4.5         | 2.5   | 2.2   | 4.1   | 2.8   | NO       | NO     | NO     | NO        | TGTTT > CGTTT                                      |
| ASL      | 4.7    | 2.8   | 3.2   | 11.8  | 2.5   | 3.8         | 3.4   | 1.9   | 5.2   | 1.6   | NO       | NO     | NO     | NO        | AAACA > GAACA                                      |
| IPMK     | 7.9    | 1.6   | 6.8   | 1.4   | 14.2  | 4.9         | 1     | 1.4   | 1     | 5.4   | YES      | NO     | YES    | NO        | AAACA > AAGCA                                      |
| PIK3AP1  | 5.3    | 2.6   | 1.1   | 4     | 8.4   | 2.5         | 2.1   | 0.6   | 2.1   | 3.1   | NO       | NO     | NO     | NO        | AAATA > AAATG                                      |
| SERPINA5 | 8.8    | 1.1   | 5.5   | 1.1   | 2.6   | 3.4         | 0.8   | 2.2   | 2     | 2.1   | NO       | NO     | NO     | YES(homo) | TGTTT > TGCTT                                      |
| CYP2A13  | 7.2    | 1.4   | 10.1  | 1     | 2.8   | 3.2         | 1.6   | 0.8   | 1.1   | 1.4   | NO       | NO     | NO     | NO        | AAACA > AAATA                                      |
| MYC (2)  | 5.7    | 5.9   | 7.6   | 2.6   | 5.4   | 5.1         | 2     | 1.4   | 0.9   | 3     | NO       | NO     | YES    | NO        | TATTT > ---- T                                     |

**B**

| ChIP/SNP | FOXA2  |       |       |       |       | ER $\alpha$ |       |       |       |       | Mutation   |            |            |            | SNP Description |
|----------|--------|-------|-------|-------|-------|-------------|-------|-------|-------|-------|------------|------------|------------|------------|-----------------|
|          | Normal | HCC-1 | HCC-2 | HCC-3 | HCC-4 | Normal      | HCC-1 | HCC-2 | HCC-3 | HCC-4 | HCC-1      | HCC-2      | HCC-3      | HCC-4      |                 |
| PPM1L    | 7.4    | 1     | 15.9  | 1.5   | 3.2   | 4.2         | 0.9   | 4.3   | 1.8   | 1.4   | YES        | NO         | YES        | YES        | AAATA > AGATA   |
| FGL1     | 10     | 0.4   | 1     | 2.5   | 2     | 4.1         | 0.3   | 0.3   | 1.8   | 1.1   | YES (homo) | YES (homo) | YES (homo) | YES (homo) | TATTT > TATTC   |
| BTG1     | 19.5   | 4.2   | 2.3   | 8.2   | 7     | 3.5         | 2     | 1.1   | 1.6   | 1.8   | YES        | YES(homo)  | YES        | YES        | TATTT > TACTT   |
| ABCC4    | 7.0    | 1.3   | 1.1   | 1     | 2.0   | 3.8         | 1.4   | 0.8   | 1.1   | 1.2   | YES        | YES        | YES*       | YES        | AAACA > CAACA   |

**C**

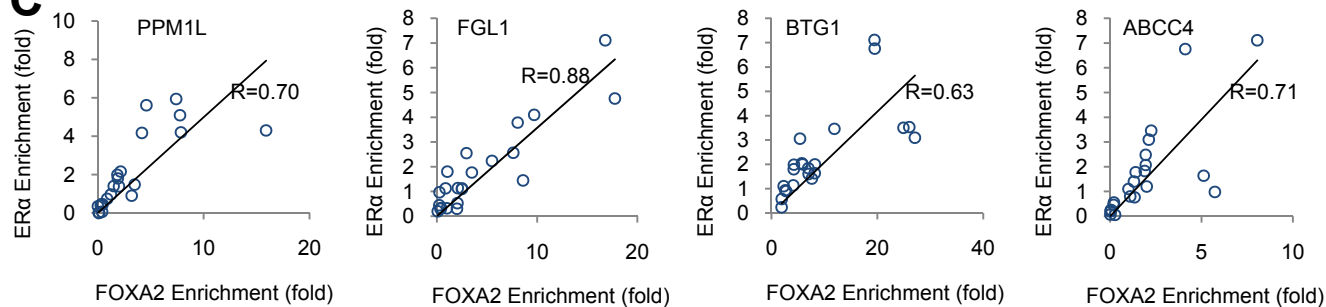

**FigureS6. Related to Figure 7**

**The relationship between hepatocellular carcinoma (HCC) and single nucleotide polymorphisms (SNPs) at FOXA2 binding sites in women**

(A,B) DNA sequencing and ChIP assays with anti-FOXA2 or anti-ER $\alpha$  revealed that mutations at the core binding element of FOXA2 binding were associated with impaired binding of both FOXA2 and ER $\alpha$  in four women livers with HCC. The ChIP enrichment of the normal liver was assayed from normal subjects without mutations in both alleles. YES, mutation presented in one allele; YES(homo), mutations in both alleles; NO, no mutation in either alleles. \*, a novel mutation/SNP. The first column contains gene names for those genes associated with SNPs at the core binding element of FOXA2 binding sites.

(C) Correlation analysis of co-binding of FOXA2 and ER $\alpha$  from all 22 normal and HCC samples (n=11 each).



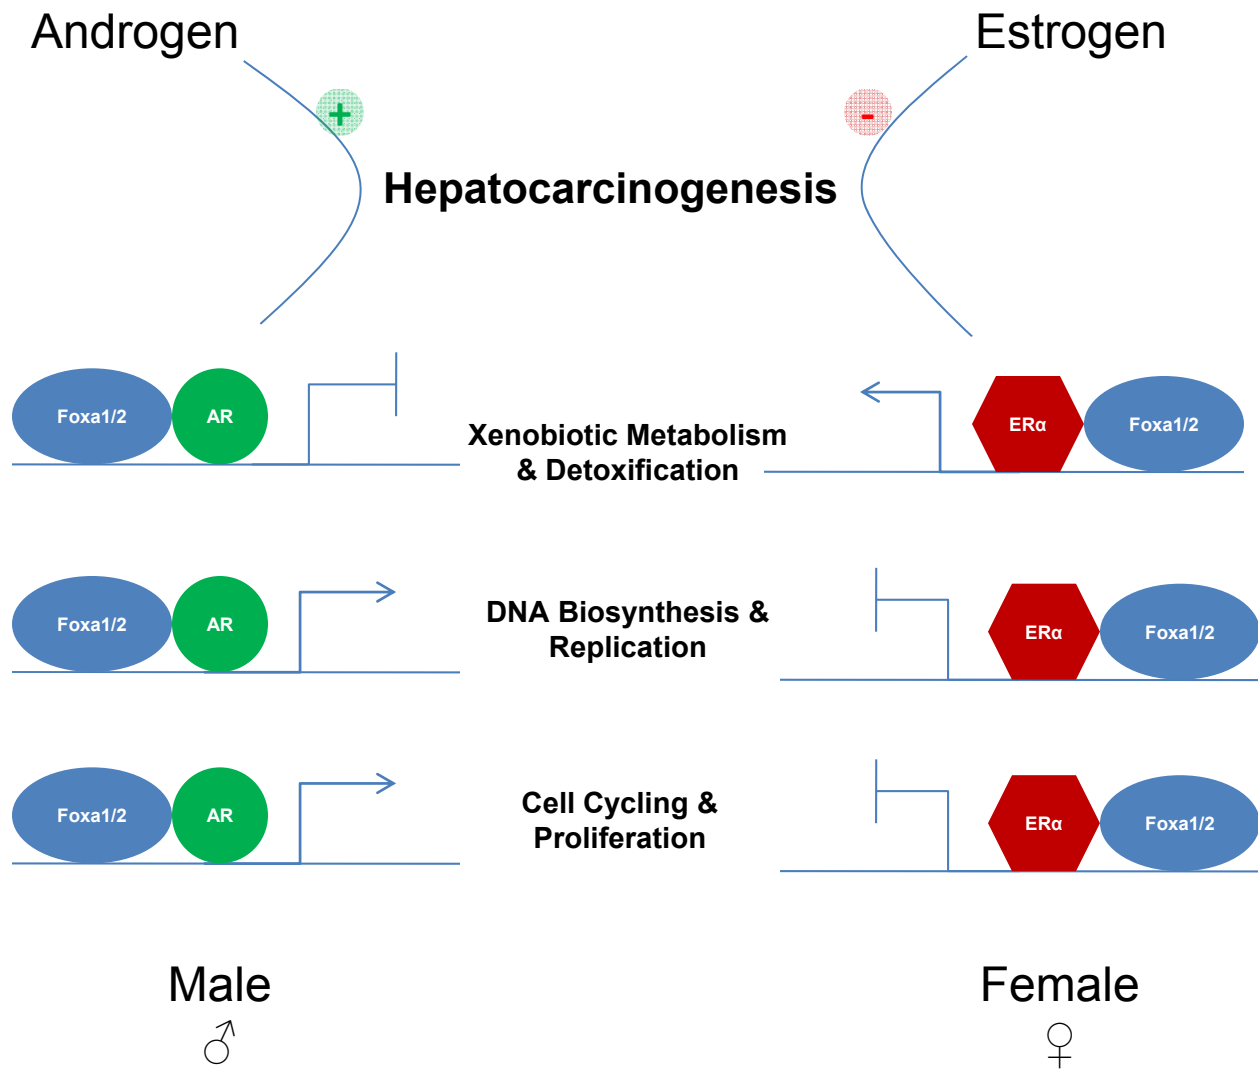

**Figure S7. Related to Figure 4**

**Foxa1/2 as the central regulator of gender dimorphism in liver cancer**

Estrogen/androgen signaling prevents/promotes liver cancer in females/males, respectively. ERα-dependent prevention and AR-mediated liver cancer promotion depend on Foxa1/2. Foxa1/2 and ERα/AR co-regulate multiple pathways of hepatocellular carcinogenesis, including xenobiotic metabolism and carcinogen detoxification, DNA biosynthesis and replication, and cell cycling and proliferation.
